# Supplementary material for: Hybrid trial for Alcohol reduction among people with TB and HIV in India (HATHI): Protocol for a Hybrid Type 1 Effectiveness-Implementation Randomized Controlled Trial
Source: Research Square preprint supplement (doi:10.21203/rs.3.rs-8759034/v1), 2026-03-25
Supplement: Supplementary file 1 [file 812f18aa33118a06ed3197cd.docx]

Appendix 1: Outcome definitions for secondary clinical outcomes

Composite TB treatment outcome (12 months)

Composite TB treatment outcome (binary) is treatment failure (defined as smear or culture positive after 5 months of treatment), default (defined interrupting treatment for ≥2 consecutive months) or all-cause mortality at 12 months.

TB treatment failure (6 months)

TB treatment failure (binary) will be defined as smear or culture positive after 5 months of TB treatment.

TB Treatment default (6 months)

TB treatment default (binary) is defined as interruption of TB treatment for ≥ 2 consecutive months.

All-cause mortality (12 months)

All-cause mortality (binary) is death from any cause obtained using the WHO Verbal Autopsy Instrument.(63, 73)

Adherence to TB treatment (6 months)

Adherence to TB treatment (binary) will be measured using self-report. Adherence will be defined as adequate if self-reported adherence is more than 90%.

Retention in TB care (6 months)

Retention in care (binary) will be assessed at 6 months from clinic records. Individuals are classified as not retained if a participant misses a scheduled visit and is unable to be contacted via telephone or home visit on 3 or more occasions.

Time to sputum-culture conversion (6 months)

Using serial sputum cultures, we will determine the median time to sputum culture conversion.

HIV Viral load suppression (6/12 months)

The composite outcome (binary) for this analysis will be viral rebound (HIV RNA >200 copies) among those who are suppressed at baseline and, HIV RNA <200those who are not suppressed, at study entry.

HIV ART Adherence (6/12 months)

Adherence to HIV ART (binary) will be measured by self-report using a visual analog scale and the ACTG adherence questionnaire.(60, 61) We will also obtain ART refill pick-up records when participants return to the clinic for refills). Adherence will be defined as adequate if self-reported adherence and refill pick-up are more than 90%.

Retention in HIV care (12 months)

Retention in care: we will define retained as a dichotomous outcome, based on the Institute of Medicine (IOM) definition of retention in care of more than or equal to two clinical visits at least three months apart.(74)

Appendix 2: Acronyms

TB: tuberculosis disease

PWH: persons with HIV

HATHI: Hybrid trial for Alcohol reduction among people with TB and HIV in India

PEth: phosphatidyl ethanol

AUD: alcohol use disorder

CBT: Cognitive behavioral therapy

MET: motivational enhancement therapy

LMIC: low and middle income country

RCT: randomized controlled trial

BI: behavioral counseling intervention

RE-AIM: Reach, Effectiveness, Adoption, Implementation, Maintenance

BJGMC: Byramjee Jeejeebhoy Government Medical College

SGH: Sassoon General Hospital

DYPMC: Dr. D.Y. Patil Medical College and Research Centre

ART: antiretroviral therapy

AUDIT: Alcohol Use Disorders Identification Test

AFB: Acid-Fast Bacilli

MDR-TB: multidrug-resistant TB

EPTB: extrapulmonary TB

MINI: Mini International Neuropsychiatric Interview

CIWA: Clinical Institute Withdrawal Assessment

UC: Usual care

MI-CRS: Motivational Interviewing Coach Rating Scale

TLFB: Time Line Follow Back

HRQoL: Health-related quality of life

DALYs: Disability adjusted life years

ACTG: AIDS Clinical Trial Group

Isoniazid: INH

CFIR: Consolidated Framework for Implementation Research

CAP: cost per patient

AE: adverse event

SAE: serious adverse event

IRB: Institutional Review Board

US: United States

DSMB: Data Safety and Monitoring Board

PI: Principal investigator

NIAAA: National Institute on Alcohol Abuse and Alcoholism

NIH: National Institutes of Health

NACO: National AIDS Control Organisation

NTEP: National TB elimination program

ICMJE: International Committee of Medical Journal Editors
